# Supplementary material
Source: publisher figshare collection journal article supplement (https://acs.figshare.com/ndownloader/files/26231692)
Supplement: Supplementary file 1 [file 26231692]

## Supporting Information

### **CsPbBr<sub>3</sub> Nanocrystals Light Emitting Diodes with Efficiency Up to 13.4% Achieved by Careful Surface Engineering and Device Engineering**

Weilin Zheng<sup>a,§</sup>, Qun Wan<sup>a,§</sup>, Mingming Liu<sup>a</sup>, Qinggang Zhang<sup>a</sup>, Congyang Zhang<sup>a</sup>, Ruixin Yan<sup>b</sup>, Xiuping Feng<sup>a</sup>, Long Kong<sup>a</sup>, Liang Li<sup>a,c\*</sup>

<sup>a</sup>School of Environmental Science and Engineering, Shanghai Jiao Tong University, 800 Dongchuan Road, Shanghai 200240, China

<sup>b</sup>China-UK Low Carbon College, Shanghai Jiaotong University, Shanghai 201306, China

<sup>c</sup>Shanghai Engineering Research Center of Solid Waste Treatment and Resource Recovery, Shanghai Jiao Tong University, Shanghai 200240, China

Weilin Zheng and Qun Wan contributed equally to this work.

Corresponding author E-mail: [liangli117@sjtu.edu.cn](mailto:liangli117@sjtu.edu.cn)

Table S1 EDS of Br and Pb for pristine CsPbBr<sub>3</sub> and DDAB treated CsPbBr<sub>3</sub> NC samples

| Sample                                 | Br/at%             | Pb/at%            | Br/Pb            |
|----------------------------------------|--------------------|-------------------|------------------|
| <b>Pristine CsPbBr<sub>3</sub> NCs</b> | 51.98              | 20.38             | 2.55             |
|                                        | 48.55              | 19.77             | 2.46             |
|                                        | 44.91              | 18.07             | 2.49             |
|                                        | 52.92              | 19.97             | 2.65             |
|                                        | 51.96              | 22.28             | 2.33             |
| <b>Mean</b>                            | <b>50.06±3.33</b>  | <b>20.09±1.51</b> | <b>2.49±0.12</b> |
| <b>CPB-1M NCs</b>                      | 54.34              | 21.34             | 2.55             |
|                                        | 57.75              | 21.64             | 2.67             |
|                                        | 35.66              | 14.21             | 2.51             |
|                                        | 43.08              | 15.44             | 2.79             |
|                                        | 43.61              | 17.52             | 2.49             |
| <b>Mean</b>                            | <b>46.89±9.01</b>  | <b>18.03±3.37</b> | <b>2.60±0.13</b> |
| <b>CPB-2M NCs</b>                      | 60.64              | 20.79             | 2.92             |
|                                        | 56.22              | 18.74             | 3.00             |
|                                        | 59.86              | 20.68             | 2.89             |
|                                        | 55.99              | 19.28             | 2.90             |
|                                        | 56.79              | 20.36             | 2.79             |
| <b>Mean</b>                            | <b>57.90±2.18</b>  | <b>19.97±0.91</b> | <b>2.90±0.08</b> |
| <b>CPB-5M NCs</b>                      | 34.47              | 12.13             | 2.84             |
|                                        | 33.33              | 11.71             | 2.85             |
|                                        | 55.18              | 19.79             | 2.79             |
|                                        | 54.60              | 19.28             | 2.83             |
|                                        | 54.69              | 18.81             | 2.91             |
| <b>Mean</b>                            | <b>46.45±11.47</b> | <b>16.34±4.06</b> | <b>2.84±0.04</b> |

As shown in Table S1, we provided the elemental analysis of Pb and Br for DDAB treated CsPbBr<sub>3</sub> NCs via EDS. To guarantee the accuracy of the data, we analyzed five locations in each sample. All samples exhibited good signal for Br and Pb, with Br/Pb ratio of 2.49±0.12 (for pristine CsPbBr<sub>3</sub> NCs), 2.60±0.13 (for CPB-1M NCs), 2.90±0.08% (for CPB-2M NCs) and 2.84±0.04% (for CPB-5M NCs), respectively.

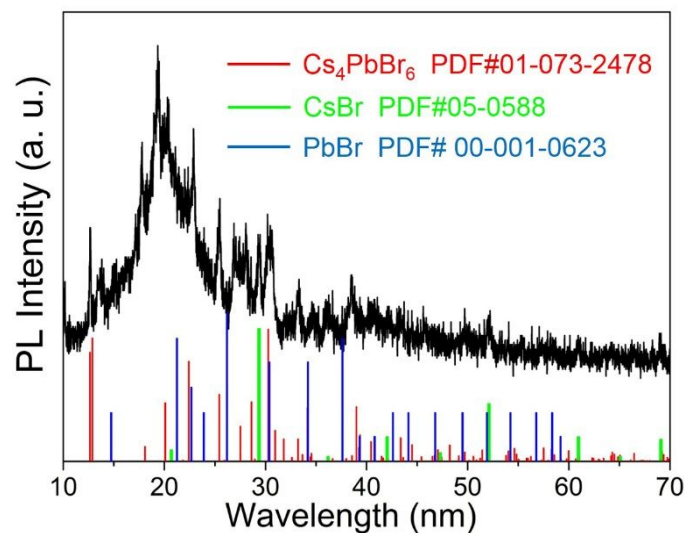

Figure S1 XRD patterns of 0.10M DDAB treated CsPbBr<sub>3</sub> NCs

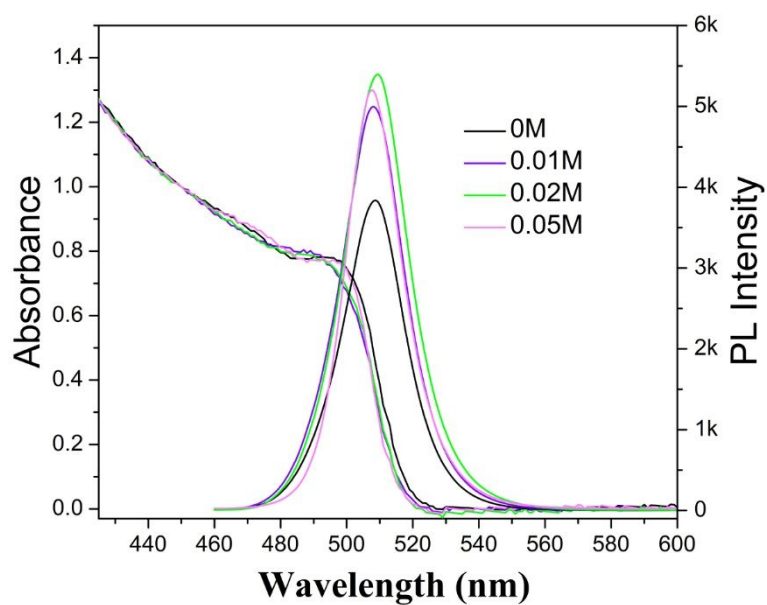

Figure S2 PL and UV-vis absorption spectra of 0M DDAB, 0.01M DDAB, 0.02M DDAB, and 0.05M DDAB treated CsPbBr<sub>3</sub> NCs.

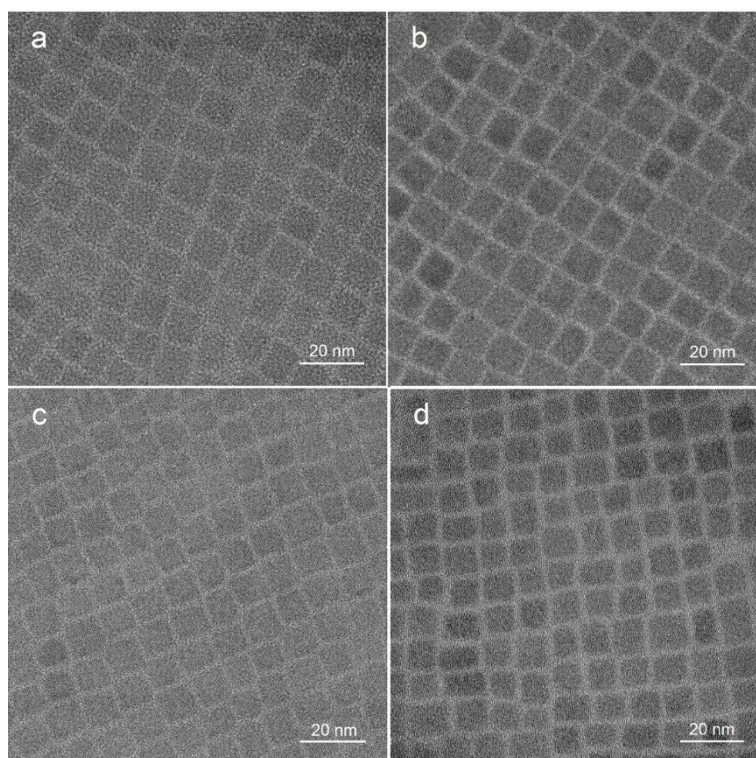

Figure S3 TEM images of a) 0M DDAB, b) 0.01M DDAB, c) 0.02M DDAB, and d) 0.05M DDAB treated CsPbBr<sub>3</sub> NCs.

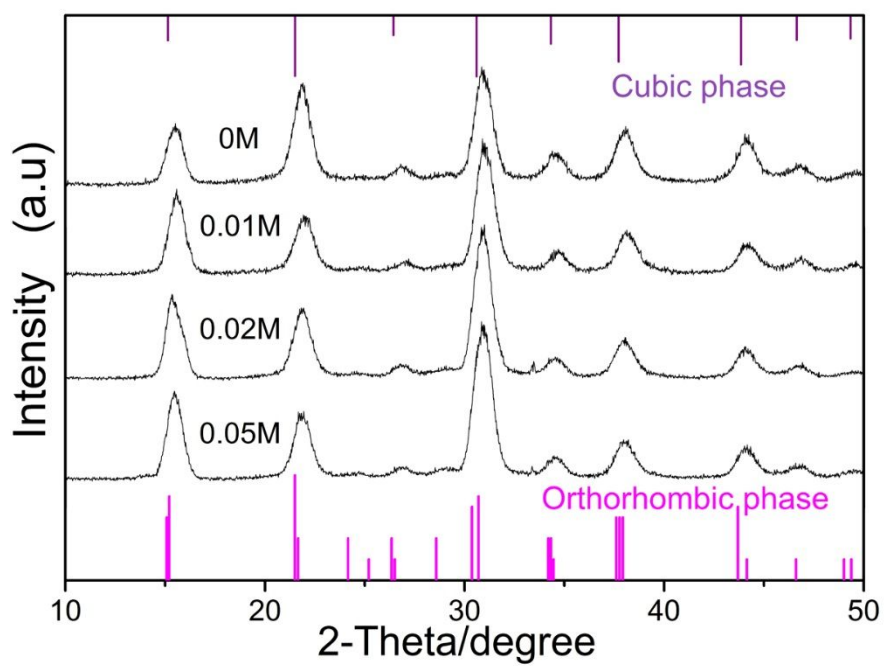

Figure S4 XRD patterns of 0M DDAB, 0.01M DDAB, 0.02M DDAB, and 0.05M DDAB treated

CsPbBr<sub>3</sub> NCs.

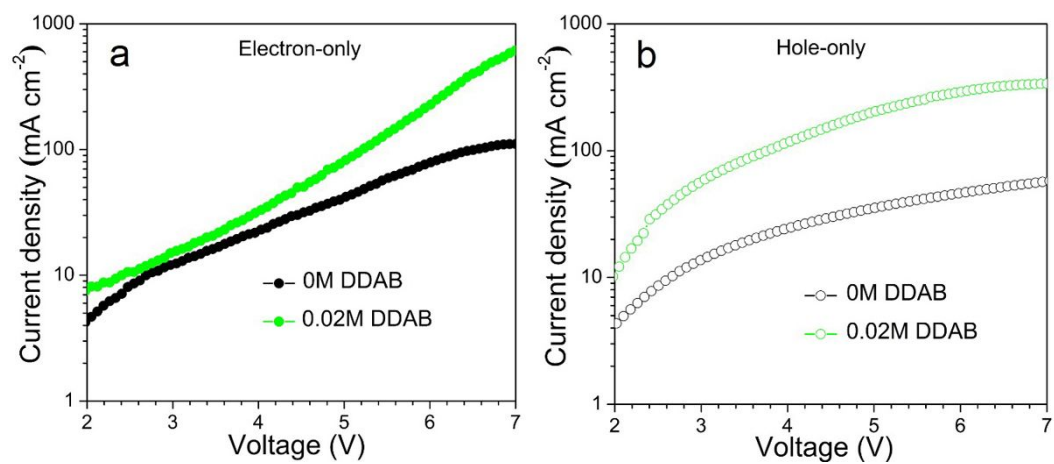

Figure S5 Current density–voltage (J–V) characteristics of a) electron-only and b) hole-only LED devices with 0M DDAB and 0.02M DDAB treated CsPbBr<sub>3</sub> films.

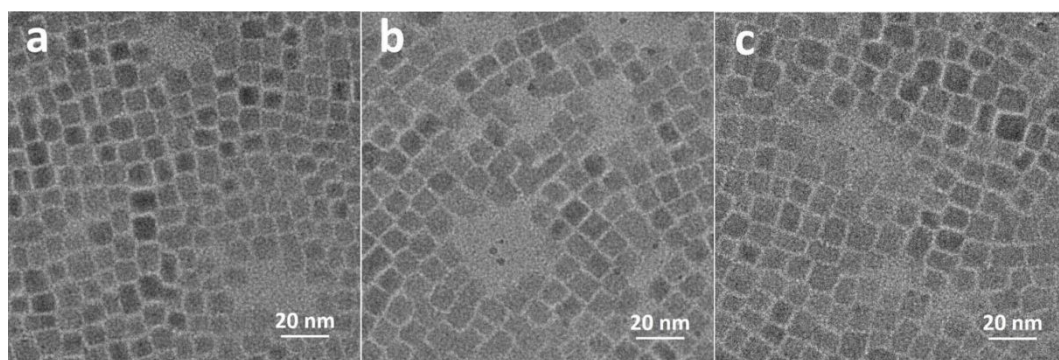

Figure S6 TEM images of CPB-2M NCs purified with different amount of methyl acetate in one cycle, and the volume ratios of methyl acetate to CPB-2M NC solution were a)1:1, b)1.5:1, and c) 2:1, respectively.

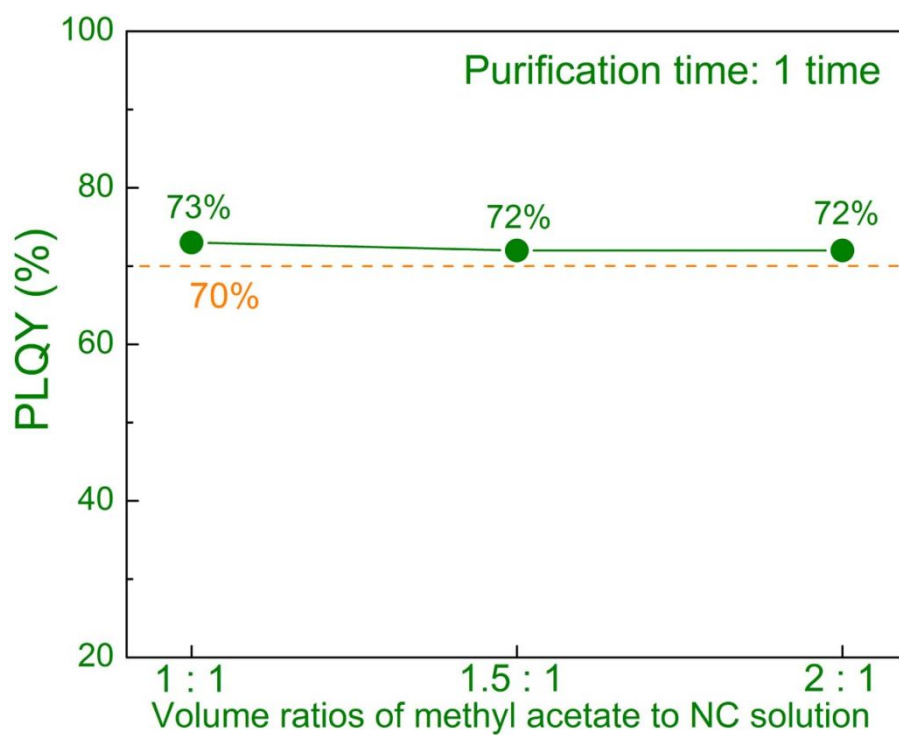

Figure S7 PLQY of CPB-2M NCs with different amount of methyl acetate in one purification cycle.

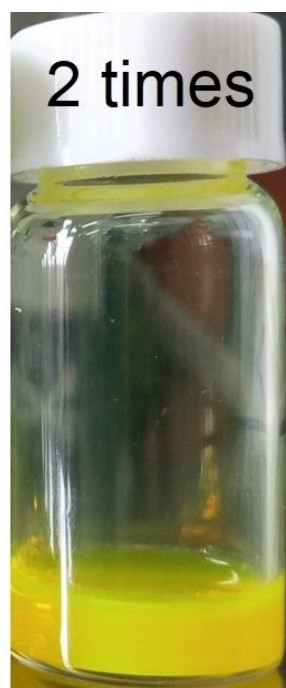

Figure S8 Photographs of CPB-2M NCs in 1-octane after two purification cycles.

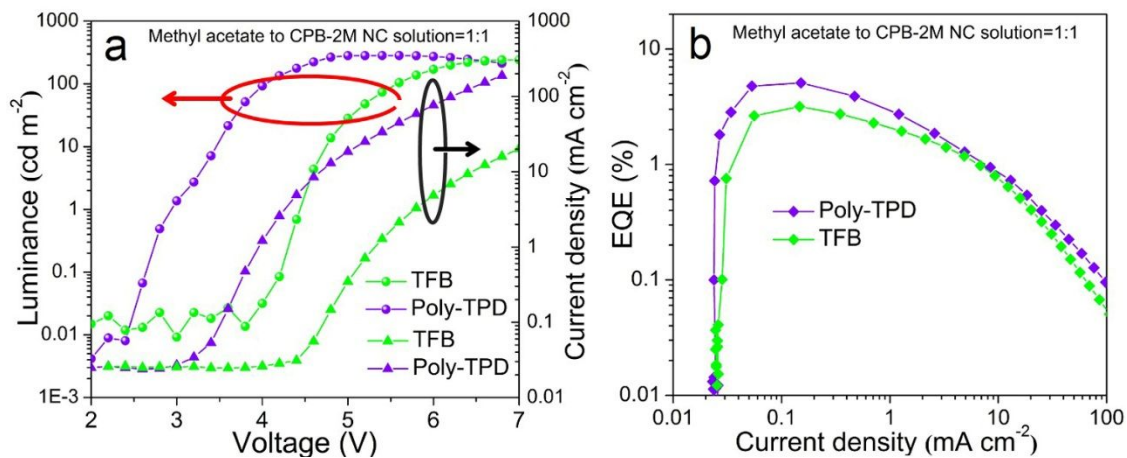

Figure S9 a) Voltage dependent current density and luminance curves of LEDs based on CPB-2M film with 1:1 volume ratios of methyl acetate to CPB-2M NC, b) EQE versus current density characteristics.

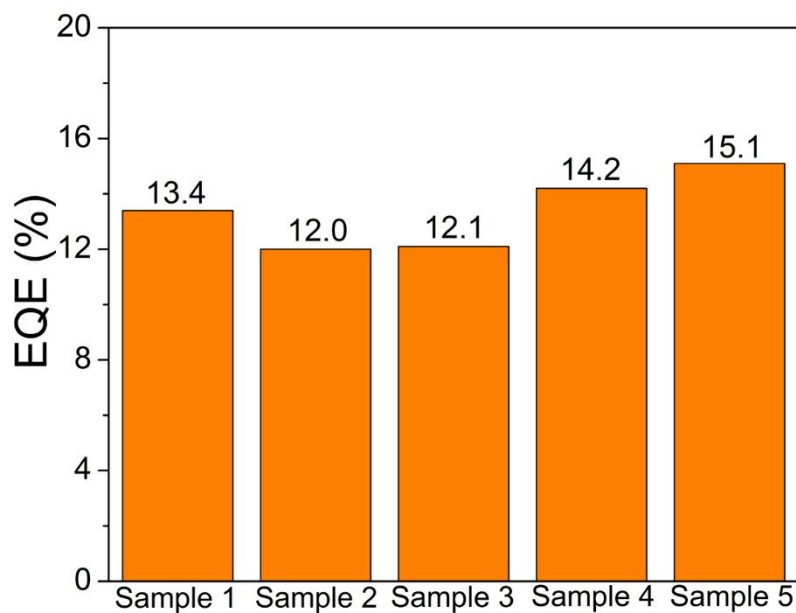

Figure S10 EQE values of LEDs fabricated with different batches of CPB-2M NCs.
